# Supplementary material
Source: publisher figshare collection journal article supplement (https://frontiersin.figshare.com/ndownloader/files/22816169)
Supplement: Supplementary file 1 [file 22816169]

| **Support Material** | **Pyrolysis T (ºC)** | **Amine** | **Adsorption Capacity**  **(mmol/g)** | **References** |
| --- | --- | --- | --- | --- |
| Sawdust biochar | 850 | MEA | 1.02 | ([Madzaki and KarimGhani, 2016](#_ENREF_6)) |
| Hickory wood Biochar | 600 | - | 1.67 | ([Creamer et al., 2014](#_ENREF_4)) |
| Hickory Chips Biochar | 600 | NH4OH | 1.20 | ([Xu et al., 2019](#_ENREF_8)) |
| Bagasse Biochar | 600 | NH4OH | 1.09 | ([Xu et al., 2019](#_ENREF_8)) |
| Sawdust Biochar | 500 | N2 | 3.70 | ([Bamdad et al., 2018](#_ENREF_1)) |
| Almond Shells Biochar | 650 | O2 | 2.02 | ([Plaza et al., 2014](#_ENREF_7)) |
| Olive Stones Biochar | 650 | O2 | 2.09 | ([Plaza et al., 2014](#_ENREF_7)) |
| Rice Straw Biochar | 600 | - | 1.02 | ([Huang et al., 2015](#_ENREF_5)) |
| Cotton Stalk Biochar | 600 | CO2-NH3 | 0.91 | ([Zhang et al., 2014](#_ENREF_9)) |
| Cotton Stalk Biochar | 700 | CO2-NH3 | 0.88 | ([Zhang et al., 2014](#_ENREF_9)) |
| Pine wood Biochar | 550 | TEPA | 2.04 | ([Chatterjee et al., 2018](#_ENREF_3)) |
| Pine wood Biochar | 550 | TEPA-MEA | 1.91 | ([Chatterjee et al., 2019](#_ENREF_2)) |
| Miscanthus Biochar | 700 | TEPA | 2.89 | This Study |
| Switchgrass Biochar | 700 | TEPA | 2.54 | This Study |
| Cornstover Biochar | 700 | TEPA | 2.37 | This Study |
| Sugarcane Bagasse Biochar | 700 | TEPA | 2.22 | This Study |

**Table S3.** Comparison of Adsorption Capacities of Biochars Synthesized in the Present Study with the Literature

**References**

Bamdad, H., Hawboldt, K., and Macquarrie, S. (2018). Nitrogen Functionalized Biochar as a Renewable Adsorbent for Efficient CO2 Removal. *Energy & Fuels* 32**,** 11742-11748.

Chatterjee, R., Sajjadi, B., Chen, W.-Y., Mattern, D.L., Egiebor, N.O., Hammer, N., and Raman, V. (2019). Low Frequency Ultrasound Enhanced Dual Amination of Biochar: A Nitrogen-Enriched Sorbent for CO2 Capture. *Energy & Fuels* 33**,** 2366-2380.

Chatterjee, R., Sajjadi, B., Mattern, D.L., Chen, W.-Y., Zubatiuk, T., Leszczynska, D., Leszczynski, J., Egiebor, N.O., and Hammer, N. (2018). Ultrasound cavitation intensified amine functionalization: A feasible strategy for enhancing CO2 capture capacity of biochar. *Fuel* 225**,** 287-298.

Creamer, A.E., Gao, B., and Zhang, M. (2014). Carbon dioxide capture using biochar produced from sugarcane bagasse and hickory wood. *Chemical Engineering Journal* 249**,** 174-179.

Huang, Y.-F., Chiueh, P.-T., Shih, C.-H., Lo, S.-L., Sun, L., Zhong, Y., and Qiu, C. (2015). Microwave pyrolysis of rice straw to produce biochar as an adsorbent for CO2 capture. *Energy* 84**,** 75-82.

Madzaki, H., and Karimghani, W.a.W.A. (2016). Carbon dioxide adsorption on sawdust biochar. *Procedia engineering* 148**,** 718-725.

Plaza, M., González, A., Pis, J., Rubiera, F., and Pevida, C. (2014). Production of microporous biochars by single-step oxidation: Effect of activation conditions on CO2 capture. *Applied energy* 114**,** 551-562.

Xu, X., Zheng, Y., Gao, B., and Cao, X. (2019). N-doped biochar synthesized by a facile ball-milling method for enhanced sorption of CO2 and reactive red. *Chemical Engineering Journal* 368**,** 564-572.

Zhang, X., Zhang, S., Yang, H., Feng, Y., Chen, Y., Wang, X., and Chen, H. (2014). Nitrogen enriched biochar modified by high temperature CO2–ammonia treatment: Characterization and adsorption of CO2. *Chemical Engineering Journal* 257**,** 20-27.
